# Supplementary material for: May halogen bonding interactions compete with Cu⋯Cl semi-coordinate bonds? Structural, magnetic and theoretical studies of two polymorphs of trans-bis(5-bromo-2-chloro pyridine)dichlorocopper(ii) and trans-bis(2,5-dichloropyridine)dichlorocopper(ii)
Source: Royal Society of Chemistry journal article supplement (doi:10.1039/c8nj00422f), 2018-01-01
Supplement: c8nj00422f1.pdf [file c8nj00422f1.pdf]

New Journal of Chemistry

**May Halogen Bonding Interactions Compete with Cu...Cl Semi-coordinate Bonds?**  
**Structural, Magnetic and Theoretical Studies of two polymorphs of *trans*-Bis(5-bromo2-chloro pyridine)dichlorocopper(II) and *trans*-Bis(2,5-dichloropyridine)dichlorocopper(II)**

Firas F. Awwadi,<sup>a,\*</sup> Mark M. Turnbull,<sup>b</sup> Manal Alwahsh,<sup>a</sup> Salim F. Haddad,<sup>a</sup>

<sup>a</sup>Department of Chemistry, The University of Jordan , Amman 11942, Jordan.

<sup>b</sup>Carlson School of Chemistry and Biochemistry, Clark University, Worcester MA 01610 USA

\* fawwadi@yahoo.com

Supplementary Material

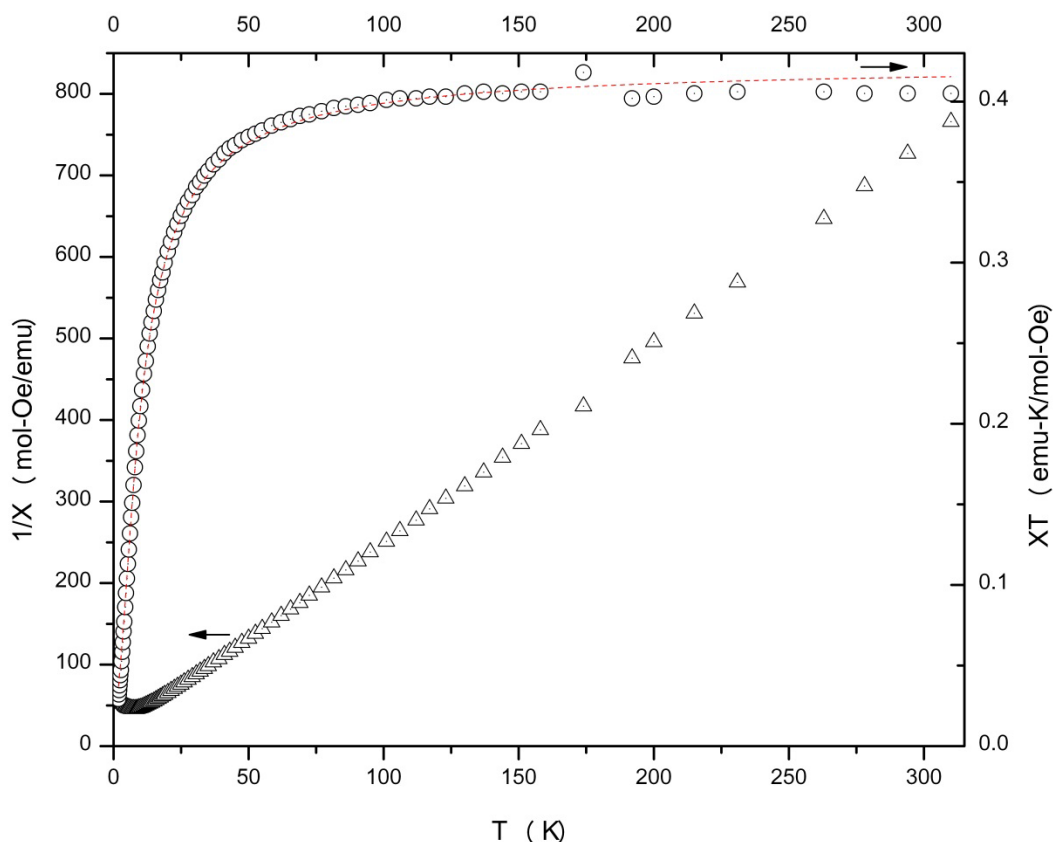

Figure S1.  $\chi T(T)$  (o) and  $\chi^{-1}(T)$  ( $\Delta$ ) for Cu(5b2cp)<sub>2</sub>Cl<sub>2</sub>\_p1. The red line represents a fit of the data to the  $S = 1/2$  uniform chain model.
